# Supplementary material
Source: PubMed Central journal article supplement (PMC8325396)
Supplement: NIHMS1724846-supplement-Supporting_Information.pdf [file NIHMS1724846-supplement-Supporting_Information.pdf]

## Supporting Information

### *Comparative Analysis of the Extracellular Matrix Proteome Across the Myotendinous Junction*

Kathryn R. Jacobson<sup>1</sup>, Sarah Lipp<sup>2</sup>, Andrea Acuna<sup>2</sup>, Yue Leng<sup>2</sup>, Ye Bu<sup>2</sup> and Sarah Calve<sup>1,2,3\*</sup>

1. Purdue University Interdisciplinary Life Science Program, 155 S. Grant Street, West Lafayette, IN 47907

2. Weldon School of Biomedical Engineering, Purdue University, 206 South Martin Jischke Drive, West Lafayette, IN 47907

3. Paul M. Rady Department of Mechanical Engineering, University of Colorado – Boulder, 1111 Engineering Center, 427 UCB, Boulder, CO 80309

\*Corresponding Author: Prof. Sarah Calve,

Prof. Sarah Calve, Tel: (303) 492-7604, E-mail: [sarah.calve@colorado.edu](mailto:sarah.calve@colorado.edu)

#### **Table of contents:**

**S-1:** Figure S1 – Pearson correlation plot based on raw intensity of ECM proteins found in GuHCl homogenate

**S-2:** Figure S2 – Heat map by ECM category of matrisome proteins identified in GuHCl homogenate from M, J and T tissue

**S-4:** Figure S3 – Identification of ECM enriched in J

**S-5:** Figure S4 – Immunolocalization of COL22A1 and a muscle-specific marker

Table S1 *xlsx* – Protein ID for GuHCl Samples

**S-6:** Table S2 – Cell Compartment Statistics

Table S3 *xlsx* – Compartmentalization Buffer Table

Table S4 *xlsx* – Protein IDs for Fractionated Samples

**S-7:** Table S5 – Matrisome Category Statistics

Table S6 *xlsx* – MaxQuant Parameters

**S-8:** Table S7 – Experimental details on reagents used for IHC

**Figure S1**

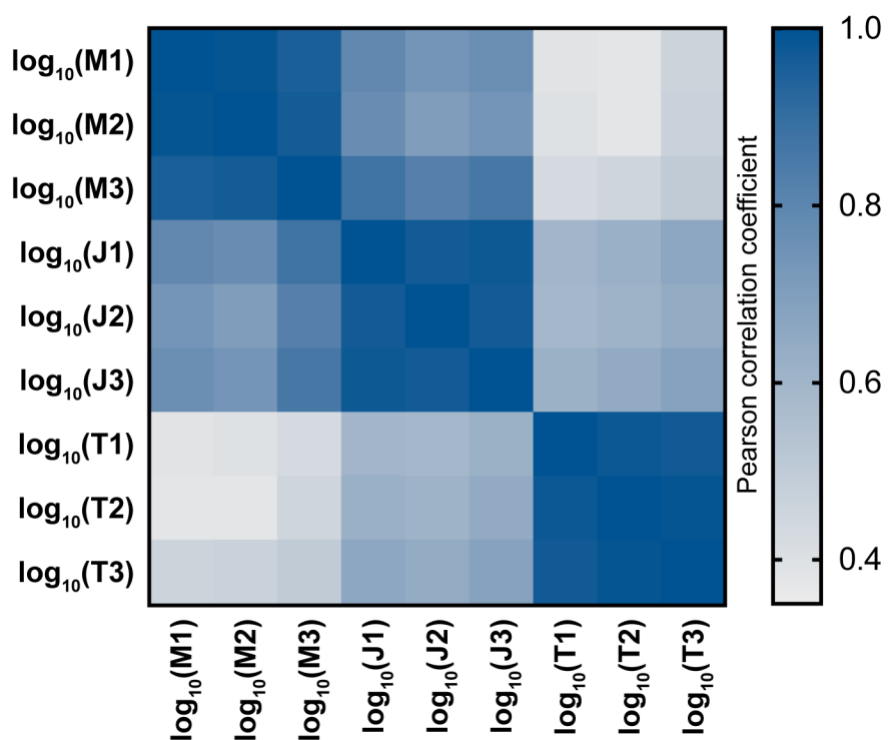

**Figure S1. Pearson correlation plot based on raw intensity of ECM proteins found in GuHCl homogenate.**

The correlation between M and T tissues was lower than M vs J and J vs T, where the ECM in J more highly correlated with M than T. Normalized raw intensities were log<sub>10</sub> transformed and Pearson correlation coefficients were calculated between samples.

Figure S2

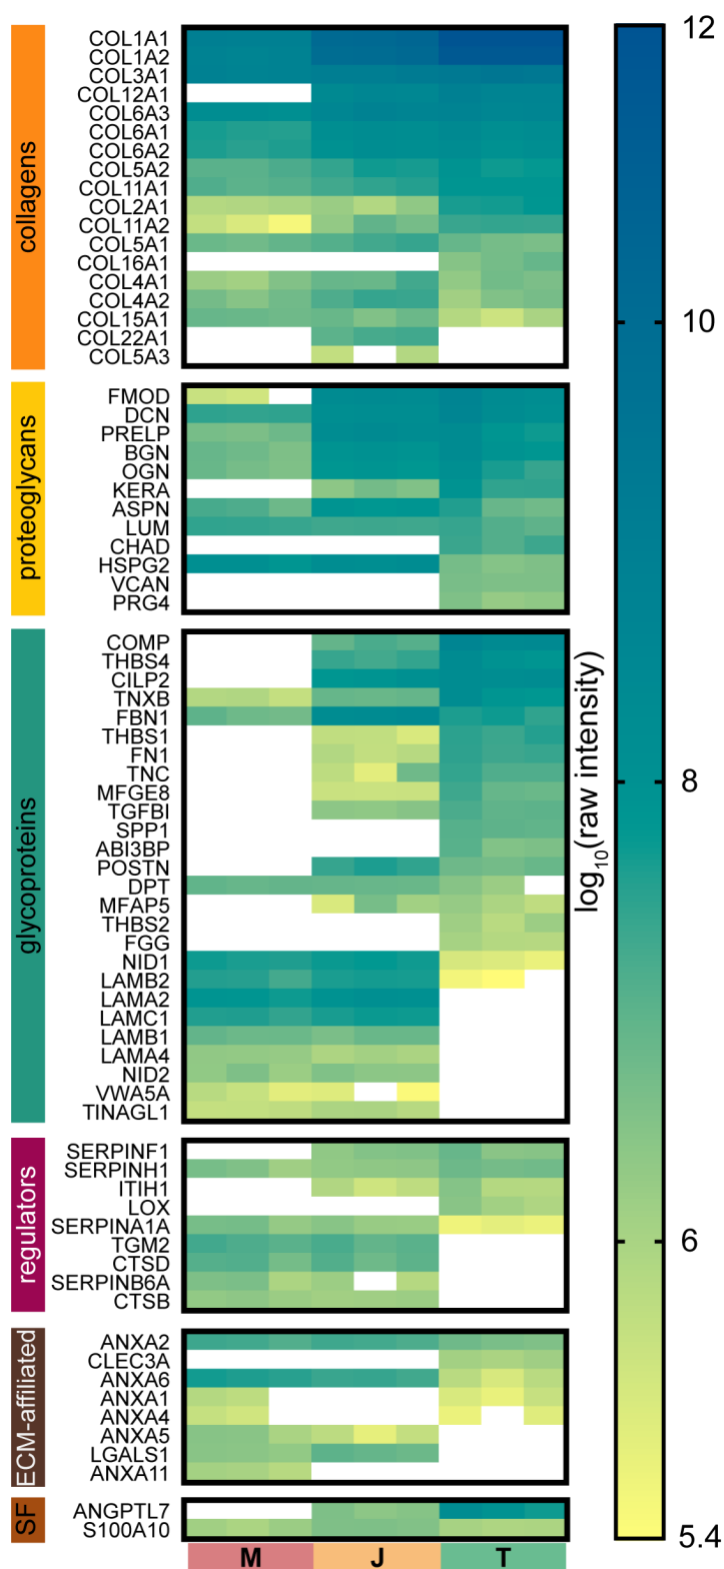

**Figure S2. Heat map by ECM category of matrisome proteins identified in GuHCl homogenate from M, J and T tissue.** Raw intensities were  $\log_{10}$  transformed and individual boxes represent each biological replicate for  $n = 3$  M, T and J samples (see also Table S1). Tissue was harvested from 5-month-old murine soleus muscle-tendon units. Rows were manually by ECM category.

**Figure S3**

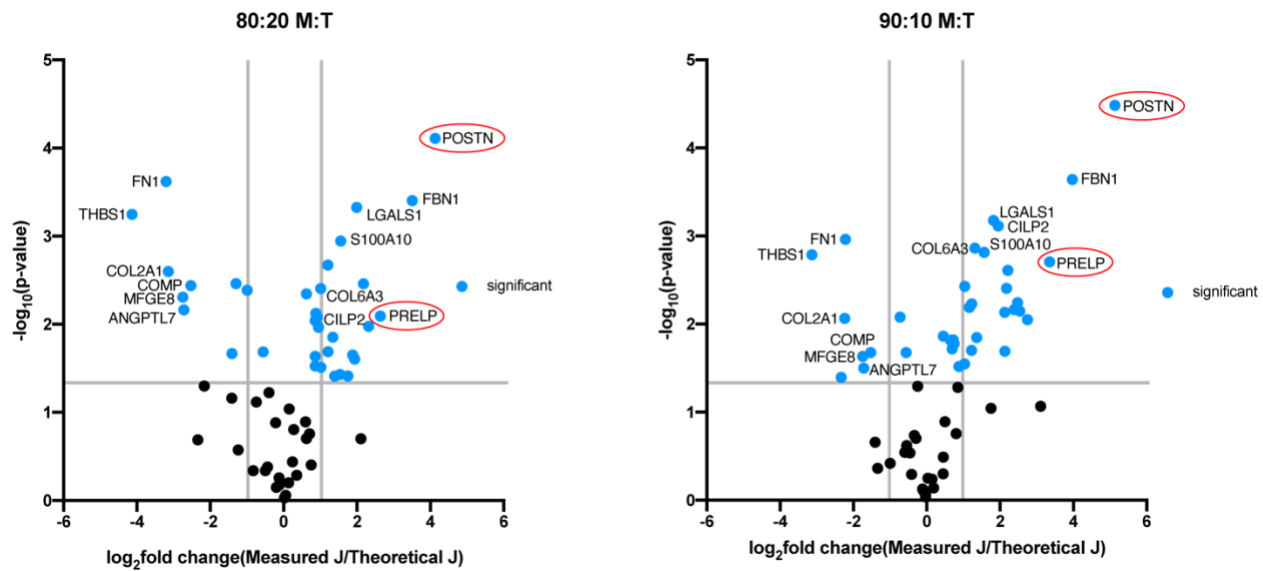

**Figure S3. Identification of ECM enriched in J.** The measured raw intensities of ECM in GuHCl-extracted J samples were compared with the theoretical raw intensity if the J was made up of an average of M and T tissue. We estimated ~ 88% M in J based on the distribution of the matrisome categories; therefore, two ratios were considered in the calculation of the theoretical raw intensities for each ECM: 80:20 and 90:10 M:J. ECM identified in the upper right portion of the volcano plots indicate ECM that are enriched in J tissues. A subset of proteins that were significantly different are labeled to show how distribution changed depending on the ratio of M:J. IHC of circled ECM can be found in Figure 4C, D. Significance was based on  $p < 0.05$  and  $|\text{fold change}| > 2$  (grey lines;  $n = 3$  biological replicates).

Figure S4

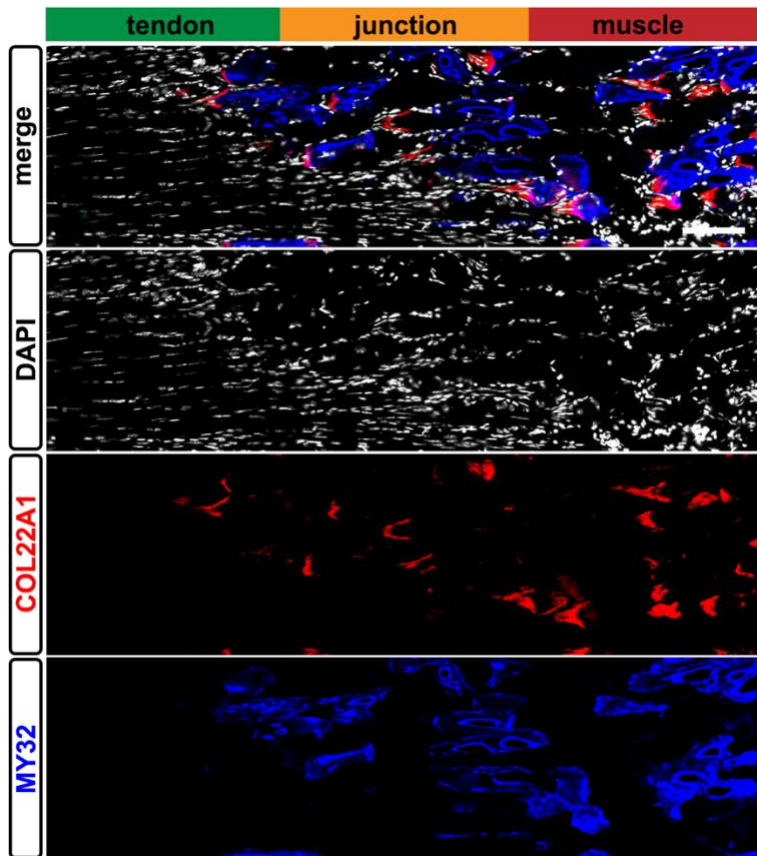

**Figure S4. Immunolocalization of COL22A1 and a muscle-specific marker.** Type XXII collagen (COL22A1, red) was found only at the interface between myofibers (MY32, blue) and T. The regions were distinguished by the differential distribution of nuclei (DAPI, white). T: aligned parallel arrays of nuclei; M: heterogeneous distribution of nuclei, localized to the periphery or in between myofibers (MY32). Images representative of  $n = 3$  biological replicates; bar = 100  $\mu\text{m}$ .

**Table S2**

|                           |                     | <b>M vs T</b> | <b>M vs J</b> | <b>J vs T</b> | <b>2-way ANOVA</b> |
|---------------------------|---------------------|---------------|---------------|---------------|--------------------|
| <b>GuHCl Homogenate</b>   | <i>Cytosolic</i>    | ****          | ns            | ****          | tissue: ns         |
|                           | <i>Nuclear</i>      | ****          | ns            | ***           |                    |
|                           | <i>Membrane</i>     | ****          | ns            | ****          | compartment: ****  |
|                           | <i>Cytoskeletal</i> | ****          | ****          | ****          | interaction: ****  |
|                           | <i>Matrisome</i>    | ****          | ****          | ****          |                    |
| <b>CS Fraction</b>        | <i>Cytosolic</i>    | ****          | ns            | ****          | tissue: ns         |
|                           | <i>Nuclear</i>      | ****          | ns            | ****          |                    |
|                           | <i>Membrane</i>     | ****          | ns            | ****          | compartment: ****  |
|                           | <i>Cytoskeletal</i> | ****          | ****          | ****          | interaction: ****  |
|                           | <i>Matrisome</i>    | ****          | ****          | ****          |                    |
| <b>Insoluble Fraction</b> | <i>Cytosolic</i>    | ns            | ns            | ns            | tissue: ns         |
|                           | <i>Nuclear</i>      | ns            | ns            | ns            |                    |
|                           | <i>Membrane</i>     | ns            | ns            | ns            | compartment: ****  |
|                           | <i>Cytoskeletal</i> | ****          | ****          | ****          | interaction: ****  |
|                           | <i>Matrisome</i>    | ****          | ****          | ****          |                    |

**Table S2. Statistical analysis of the distribution of cellular compartment as a function of tissue type.** Two-way ANOVA was performed on  $n = 3$  biological replicates of data represented in Figure 2A and Tukey's multiple comparisons was used for post hoc analysis. \*\*\*  $p < 0.001$ ; \*\*\*\*  $p < 0.0001$ ; ns = not significant ( $p > 0.05$ ).

**Table S5**

|                           |                                | <b>M vs T</b> | <b>M vs J</b> | <b>J vs T</b> | <b>2-way ANOVA</b>                                   |
|---------------------------|--------------------------------|---------------|---------------|---------------|------------------------------------------------------|
| <b>GuHCl Homogenate</b>   | <i>Secreted factors</i>        | ****          | ****          | ns            | tissue: ns<br>compartment: ****<br>interaction: **** |
|                           | <i>ECM-affiliated proteins</i> | ns            | ns            | ns            |                                                      |
|                           | <i>ECM regulators</i>          | ns            | ns            | ns            |                                                      |
|                           | <i>Glycoproteins</i>           | **            | ns            | ns            |                                                      |
|                           | <i>Proteoglycans</i>           | *             | ns            | ns            |                                                      |
|                           | <i>Collagens</i>               | ****          | ****          | *             |                                                      |
| <b>CS Fraction</b>        | <i>Secreted factors</i>        | ns            | ns            | ns            | tissue: ns<br>compartment: ****<br>interaction: **** |
|                           | <i>ECM-affiliated proteins</i> | ns            | ns            | ns            |                                                      |
|                           | <i>ECM regulators</i>          | ns            | ns            | ns            |                                                      |
|                           | <i>Glycoproteins</i>           | ****          | ****          | ns            |                                                      |
|                           | <i>Proteoglycans</i>           | ****          | ****          | *             |                                                      |
|                           | <i>Collagens</i>               | ****          | ****          | **            |                                                      |
| <b>Insoluble Fraction</b> | <i>Secreted factors</i>        | ns            | ns            | ns            | tissue: ns<br>compartment: ****<br>interaction: **** |
|                           | <i>ECM-affiliated proteins</i> | ns            | ns            | ns            |                                                      |
|                           | <i>ECM regulators</i>          | ns            | ns            | ns            |                                                      |
|                           | <i>Glycoproteins</i>           | ****          | **            | ns            |                                                      |
|                           | <i>Proteoglycans</i>           | ns            | ns            | ns            |                                                      |
|                           | <i>Collagens</i>               | ****          | ***           | ns            |                                                      |

**Table S5. Statistical analysis of the distribution of different ECM categories as a function of tissue type.** Two-way ANOVA was performed on  $n = 3$  biological replicates of data represented in Figure 2B and Tukey's multiple comparisons was used for post hoc analysis. \*  $p < 0.05$ ; \*\*  $p < 0.01$ ; \*\*\*  $p < 0.001$ ; \*\*\*\*  $p < 0.0001$ ; ns = not significant ( $p > 0.05$ ).



**Table S7: Experimental details on reagents used for IHC**

| Antigen                                           | Host                                    | Company                  | Product number | Lot number                                          | Initial concentration | Dilution         | RRID        |
|---------------------------------------------------|-----------------------------------------|--------------------------|----------------|-----------------------------------------------------|-----------------------|------------------|-------------|
| COL5A3                                            | rabbit polyclonal                       | Invitrogen               | PA5-77257      | UJ2851627                                           | 1 mg/mL               | 1:100            | AB_2720984  |
| COL5A1/A2/A3                                      | goat polyclonal                         | Southern Biotech         | 1350-01        | A1517WE68Z                                          | 0.4 mg/mL             | 1:100            | AB_2794740  |
| COL22A1                                           | rabbit polyclonal                       | Abcam                    | ab121846       | GR223910-16<br>GR223910-17                          | 0.3 mg/mL             | 1:250            | AB_11128704 |
| LAMA2                                             | rat monoclonal IgG1 (clone 4H8-2)       | Santa Cruz Biotechnology | sc-59854       | A1312                                               | 0.2 mg/mL             | 1:100            | AB_784266   |
| NID2                                              | mouse monoclonal IgG1 kappa (clone F-2) | Santa Cruz Biotechnology | sc-377424      | E1618                                               | 0.2 mg/mL             | 1:50             | AB_2819357  |
| anti-skeletal muscle myosin heavy chain (MY32)    | mouse IgG1 monoclonal; (clone MYSN02)   | Thermo Fisher Scientific | MA5-11748      | 1634061A                                            | 0.126 mg/ml           | 1:100            | AB_10979315 |
| PRELP                                             | sheep polyclonal                        | Invitrogen               | PA547841       | VF18802A                                            | 0.2 mg/mL             | 1:300            | AB_2608591  |
| POSTN                                             | rabbit polyclonal                       | Abcam                    | AB14041        | GR3303878-4                                         | 0.5 mg/ml             | 1:300            | AB_2299859  |
| TNC                                               | rat monoclonal IgG2A (clone 578)        | R&D Systems              | MAB2138        | KLC0718071<br>KLC0719091                            | 0.5 mg/mL             | 1:100 -<br>1:200 | AB_2203818  |
| TNC                                               | rabbit polyclonal                       | Sigma-Aldrich            | AB19013        | 3257092                                             | 0.5 mg/mL             | 1:200            | AB_2256033  |
| <b>Donkey-anti-rabbit IgG1 488</b>                |                                         | Invitrogen               | A21206         | 2072687                                             | 2 mg/ml               | 1:500            | AB_2535792  |
| <b>Goat-anti-rabbit IgG1 488</b>                  |                                         | Invitrogen               | A-11034        | 1971418                                             | 2 mg/ml               | 1:500            | AB_2576217  |
| <b>Donkey-anti-rat 488</b>                        |                                         | Invitrogen               | A-21208        | 1979698<br>2180272                                  | 2 mg/mL               | 1:500            | AB_141709   |
| <b>Donkey-anti-rat IgG1 550</b>                   |                                         | Dylight                  | SA5-10027      | Te2575666                                           | 2 mg/mL               | 1:250            | AB_2556607  |
| <b>Donkey-anti-rabbit 546</b>                     |                                         | Invitrogen               | A-10040        | 1833519                                             | 2 mg/mL               | 1:500            | AB_2534016  |
| <b>Goat-anti-mouse IgG1 546</b>                   |                                         | Invitrogen               | A-21123        | 2132524                                             | 2 mg/mL               | 1:500            | AB_2535768  |
| <b>Donkey-anti-goat IgG1 647</b>                  |                                         | Invitrogen               | A-21447        | 2045332                                             | 2 mg/mL               | 1:500            | AB_2535853  |
| <b>Chicken-anti-rat IgG 647</b>                   |                                         | Invitrogen               | A-21472        | 1889323                                             | 2 mg/ml               | 1:500            | AB_2535875  |
| <b>Donkey-anti-sheep IgG 647</b>                  |                                         | Invitrogen               | A-21448        | 20405339                                            | 2 mg/ml               | 1:500            | AB_2535865  |
| <b>Goat-anti-mouse IgG1 633</b>                   |                                         | Invitrogen               | A-21126        | 1840916<br>2128996                                  | 2 mg/mL               | 1:500            | AB_2535768  |
| <b>DAPI</b>                                       |                                         | Biotium                  | 40011          | n/a                                                 | 1 mg/ml               | 1:500            |             |
| <b>Mouse on Mouse (M.O.M.) Ig blocking buffer</b> |                                         | Vector Laboratories      | 30035          | ZE1226,<br>ZE0723,<br>ZF3620,<br>ZF0620,<br>ZF0920, | 90 µl: 2.5 ml 1× PBS  |                  |             |
| <b>M.O.M. protein diluent</b>                     |                                         | Vector Laboratories      | 30045          | ZF0620,<br>ZF0417                                   | 600 µl: 7.5 ml 1× PBS |                  |             |
